# Supplementary material for: Integrated metabolomic and transcriptomic analysis of the anthocyanin and proanthocyanidin regulatory networks in red walnut natural hybrid progeny leaves
Source: PeerJ. 2022 Oct 20;10:e14262. doi: 10.7717/peerj.14262 (PMC9588303; doi:10.7717/peerj.14262)
Supplement: Supplemental Information 3 [file peerj-10-14262-s003.xls]

## Sheet: C4H
Block Type	96fast
Chemistry	SYBR_GREEN
Experiment Run End Time	2021-01-11 21:09:40 PM PST
Instrument Type	sds7500fast
Passive Reference	ROX
Well	Sample Name	Target Name	Task	Reporter	Quencher	Cт	Cт Mean	Cт SD	Quantity	Normalized Quantity	Normalized Quantity Mean	Normalized Quantity SEM	RQ	RQ Min	RQ Max	Efficiency	Slope	Automatic Ct Threshold	Ct Threshold	Automatic Baseline	Baseline Start	Baseline End	Tm1	Tm2	Tm3	Comments	HIGHSD	OUTLIERRG	MTP
A1	SR1	18s	UNKNOWN	SYBR	None	28.9202	28.7747	0.129034										TRUE	1.07395	TRUE	3	22	79.9305				N	N	N
A2	SR1	18s	UNKNOWN	SYBR	None	28.7296	28.7747	0.129034										TRUE	1.07395	TRUE	3	20	80.0959				N	N	N
A3	SR1	18s	UNKNOWN	SYBR	None	28.6742	28.7747	0.129034										TRUE	1.07395	TRUE	3	21	80.2614				N	N	N
B1	SR2	18s	UNKNOWN	SYBR	None	28.5084	28.6936	0.233084										TRUE	1.07395	TRUE	3	21	80.0959				N	N	N
B2	SR2	18s	UNKNOWN	SYBR	None	28.9553	28.6936	0.233084										TRUE	1.07395	TRUE	3	21	80.4269				N	N	N
B3	SR2	18s	UNKNOWN	SYBR	None	28.617	28.6936	0.233084										TRUE	1.07395	TRUE	3	21	80.5924				N	N	N
C1	SR3	18s	UNKNOWN	SYBR	None	28.3796	28.2251	0.207694										TRUE	1.07395	TRUE	3	21	80.2614				N	N	N
C2	SR3	18s	UNKNOWN	SYBR	None	27.989	28.2251	0.207694										TRUE	1.07395	TRUE	3	20	80.4269				N	N	N
C3	SR3	18s	UNKNOWN	SYBR	None	28.3066	28.2251	0.207694										TRUE	1.07395	TRUE	3	21	80.7579				N	N	N
D1	SG1	18s	UNKNOWN	SYBR	None	28.6645	28.917	0.265727										TRUE	1.07395	TRUE	3	21	80.2614				N	N	N
D2	SG1	18s	UNKNOWN	SYBR	None	29.1942	28.917	0.265727										TRUE	1.07395	TRUE	3	22	80.5924				N	N	N
D3	SG1	18s	UNKNOWN	SYBR	None	28.8922	28.917	0.265727										TRUE	1.07395	TRUE	3	21	80.9234				N	N	N
E1	SG2	18s	UNKNOWN	SYBR	None	30.5795	30.4435	0.216576										TRUE	1.07395	TRUE	3	23	80.4269				N	N	N
E2	SG2	18s	UNKNOWN	SYBR	None	30.5572	30.4435	0.216576										TRUE	1.07395	TRUE	3	23	80.7579				N	N	N
E3	SG2	18s	UNKNOWN	SYBR	None	30.1937	30.4435	0.216576										TRUE	1.07395	TRUE	3	23	80.7579				N	N	N
F1	SG3	18s	UNKNOWN	SYBR	None	29.065	28.8659	0.183806										TRUE	1.07395	TRUE	3	21	80.2614				N	N	N
F2	SG3	18s	UNKNOWN	SYBR	None	28.7026	28.8659	0.183806										TRUE	1.07395	TRUE	3	21	80.4269				N	N	N
F3	SG3	18s	UNKNOWN	SYBR	None	28.83	28.8659	0.183806										TRUE	1.07395	TRUE	3	21	80.5924				N	N	N
A4	SR1	C4H（gene40343）	UNKNOWN	SYBR	None	19.132	19.1291	0.0441822										TRUE	0.867118	TRUE	3	12	82.7437				N	N	N
A5	SR1	C4H（gene40343）	UNKNOWN	SYBR	None	19.0835	19.1291	0.0441822										TRUE	0.867118	TRUE	3	11	82.9091				N	N	N
A6	SR1	C4H（gene40343）	UNKNOWN	SYBR	None	19.1717	19.1291	0.0441822										TRUE	0.867118	TRUE	3	12	83.0746				N	N	N
B4	SR2	C4H（gene40343）	UNKNOWN	SYBR	None	23.0952	23.073	0.0328855										TRUE	0.867118	TRUE	3	16	83.0746				N	N	N
B5	SR2	C4H（gene40343）	UNKNOWN	SYBR	None	23.0886	23.073	0.0328855										TRUE	0.867118	TRUE	3	16	83.2401				N	N	N
B6	SR2	C4H（gene40343）	UNKNOWN	SYBR	None	23.0352	23.073	0.0328855										TRUE	0.867118	TRUE	3	16	83.2401				N	N	N
C4	SR3	C4H（gene40343）	UNKNOWN	SYBR	None	18.5631	18.5496	0.0203451										TRUE	0.867118	TRUE	3	11	83.2401				N	N	N
C5	SR3	C4H（gene40343）	UNKNOWN	SYBR	None	18.5595	18.5496	0.0203451										TRUE	0.867118	TRUE	3	11	83.4056				N	N	N
C6	SR3	C4H（gene40343）	UNKNOWN	SYBR	None	18.5262	18.5496	0.0203451										TRUE	0.867118	TRUE	3	11	83.5711				N	N	N
D4	SG1	C4H（gene40343）	UNKNOWN	SYBR	None	20.391	20.4331	0.0647658										TRUE	0.867118	TRUE	3	13	83.4056				N	N	N
D5	SG1	C4H（gene40343）	UNKNOWN	SYBR	None	20.5077	20.4331	0.0647658										TRUE	0.867118	TRUE	3	13	83.7365				N	N	N
D6	SG1	C4H（gene40343）	UNKNOWN	SYBR	None	20.4006	20.4331	0.0647658										TRUE	0.867118	TRUE	3	14	83.902				N	N	N
E4	SG2	C4H（gene40343）	UNKNOWN	SYBR	None	21.4247	21.3289	0.0936704										TRUE	0.867118	TRUE	3	14	83.5711				N	N	N
E5	SG2	C4H（gene40343）	UNKNOWN	SYBR	None	21.2375	21.3289	0.0936704										TRUE	0.867118	TRUE	3	14	83.7365				N	N	N
E6	SG2	C4H（gene40343）	UNKNOWN	SYBR	None	21.3246	21.3289	0.0936704										TRUE	0.867118	TRUE	3	14	83.902				N	N	N
F4	SG3	C4H（gene40343）	UNKNOWN	SYBR	None	21.8784	21.8996	0.0221543										TRUE	0.867118	TRUE	3	15	83.4056				N	N	N
F5	SG3	C4H（gene40343）	UNKNOWN	SYBR	None	21.8978	21.8996	0.0221543										TRUE	0.867118	TRUE	3	15	83.5711				N	N	N
F6	SG3	C4H（gene40343）	UNKNOWN	SYBR	None	21.9226	21.8996	0.0221543										TRUE	0.867118	TRUE	3	15	83.7365				N	N	N
A7	SR1	C4H(gene42522)	UNKNOWN	SYBR	None	21.2347	21.2725	0.0335618										TRUE	0.637704	TRUE	3	14	80.5924				N	N	N
A8	SR1	C4H(gene42522)	UNKNOWN	SYBR	None	21.299	21.2725	0.0335618										TRUE	0.637704	TRUE	3	15	80.5924				N	N	N
A9	SR1	C4H(gene42522)	UNKNOWN	SYBR	None	21.2837	21.2725	0.0335618										TRUE	0.637704	TRUE	3	14	80.4269				N	N	N
B7	SR2	C4H(gene42522)	UNKNOWN	SYBR	None	23.2865	23.2353	0.0446139										TRUE	0.637704	TRUE	3	16	80.9234				N	N	N
B8	SR2	C4H(gene42522)	UNKNOWN	SYBR	None	23.2149	23.2353	0.0446139										TRUE	0.637704	TRUE	3	17	80.7579				N	N	N
B9	SR2	C4H(gene42522)	UNKNOWN	SYBR	None	23.2045	23.2353	0.0446139										TRUE	0.637704	TRUE	3	17	80.7579				N	N	N
C7	SR3	C4H(gene42522)	UNKNOWN	SYBR	None	20.9768	20.9431	0.0517626										TRUE	0.637704	TRUE	3	14	81.2543				N	N	N
C8	SR3	C4H(gene42522)	UNKNOWN	SYBR	None	20.969	20.9431	0.0517626										TRUE	0.637704	TRUE	3	14	81.0888				N	N	N
C9	SR3	C4H(gene42522)	UNKNOWN	SYBR	None	20.8835	20.9431	0.0517626										TRUE	0.637704	TRUE	3	14	80.9234				N	N	N
D7	SG1	C4H(gene42522)	UNKNOWN	SYBR	None	21.8644	21.9278	0.0651538										TRUE	0.637704	TRUE	3	15	81.4198				N	N	N
D8	SG1	C4H(gene42522)	UNKNOWN	SYBR	None	21.9245	21.9278	0.0651538										TRUE	0.637704	TRUE	3	15	81.2543				N	N	N
D9	SG1	C4H(gene42522)	UNKNOWN	SYBR	None	21.9946	21.9278	0.0651538										TRUE	0.637704	TRUE	3	15	81.0888				N	N	N
E7	SG2	C4H(gene42522)	UNKNOWN	SYBR	None	23.7786	23.8135	0.0621699										TRUE	0.637704	TRUE	3	17	81.2543				N	N	N
E8	SG2	C4H(gene42522)	UNKNOWN	SYBR	None	23.8853	23.8135	0.0621699										TRUE	0.637704	TRUE	3	17	81.2543				N	N	N
E9	SG2	C4H(gene42522)	UNKNOWN	SYBR	None	23.7767	23.8135	0.0621699										TRUE	0.637704	TRUE	3	17	81.2543				N	N	N
F7	SG3	C4H(gene42522)	UNKNOWN	SYBR	None	22.9522	22.9592	0.0160183										TRUE	0.637704	TRUE	3	16	81.4198				N	N	N
F8	SG3	C4H(gene42522)	UNKNOWN	SYBR	None	22.948	22.9592	0.0160183										TRUE	0.637704	TRUE	3	16	81.2543				N	N	N
F9	SG3	C4H(gene42522)	UNKNOWN	SYBR	None	22.9776	22.9592	0.0160183										TRUE	0.637704	TRUE	3	16	81.0888				N	N	N
A10	SR1	F3H(gene40994)	UNKNOWN	SYBR	None	33.3489	32.4006	1.28033										TRUE	0.722452	TRUE	3	27	81.7508				Y	N	N
A11	SR1	F3H(gene40994)	UNKNOWN	SYBR	None	32.9087	32.4006	1.28033										TRUE	0.722452	TRUE	3	26	80.7579	75.297			Y	N	Y
A12	SR1	F3H(gene40994)	UNKNOWN	SYBR	None	30.9443	32.4006	1.28033										TRUE	0.722452	TRUE	3	24	77.7792				Y	N	N
B10	SR2	F3H(gene40994)	UNKNOWN	SYBR	None	29.0433	29.9096	0.750281										TRUE	0.722452	TRUE	3	22	81.9162				Y	Y	N
B11	SR2	F3H(gene40994)	UNKNOWN	SYBR	None	30.3371	29.9096	0.750281										TRUE	0.722452	TRUE	3	24	81.7508				Y	N	N
B12	SR2	F3H(gene40994)	UNKNOWN	SYBR	None	30.3485	29.9096	0.750281										TRUE	0.722452	TRUE	3	23	81.5853				Y	N	N
C10	SR3	F3H(gene40994)	UNKNOWN	SYBR	None	30.609	31.601	1.08018										TRUE	0.722452	TRUE	3	24	81.9162				Y	N	N
C11	SR3	F3H(gene40994)	UNKNOWN	SYBR	None	31.4423	31.601	1.08018										TRUE	0.722452	TRUE	3	25	82.0817				Y	N	N
C12	SR3	F3H(gene40994)	UNKNOWN	SYBR	None	32.7518	31.601	1.08018										TRUE	0.722452	TRUE	3	26	81.5853				Y	N	N
D10	SG1	F3H(gene40994)	UNKNOWN	SYBR	None	31.6711	32.591	0.802217										TRUE	0.722452	TRUE	3	25	82.2472				Y	N	N
D11	SG1	F3H(gene40994)	UNKNOWN	SYBR	None	33.1449	32.591	0.802217										TRUE	0.722452	TRUE	3	26	77.1173				Y	N	N
D12	SG1	F3H(gene40994)	UNKNOWN	SYBR	None	32.9571	32.591	0.802217										TRUE	0.722452	TRUE	3	26	82.0817				Y	N	N
E10	SG2	F3H(gene40994)	UNKNOWN	SYBR	None	31.5326	31.3116	0.368843										TRUE	0.722452	TRUE	3	25	82.0817				N	N	N
E11	SG2	F3H(gene40994)	UNKNOWN	SYBR	None	31.5164	31.3116	0.368843										TRUE	0.722452	TRUE	3	25	82.0817				N	N	N
E12	SG2	F3H(gene40994)	UNKNOWN	SYBR	None	30.8858	31.3116	0.368843										TRUE	0.722452	TRUE	3	24	81.9162	77.2827			N	Y	Y
F10	SG3	F3H(gene40994)	UNKNOWN	SYBR	None	33.149	33.1682	0.436154										TRUE	0.722452	TRUE	3	26	84.3985				N	N	N
F11	SG3	F3H(gene40994)	UNKNOWN	SYBR	None	33.6136	33.1682	0.436154										TRUE	0.722452	TRUE	3	27	81.9162	87.8736			N	N	Y
F12	SG3	F3H(gene40994)	UNKNOWN	SYBR	None	32.7419	33.1682	0.436154										TRUE	0.722452	TRUE	3	26	81.5853				N	N	N
G1	SR1	F3'5'H(gene4387)	UNKNOWN	SYBR	None	23.6049	23.3051	0.259629										TRUE	0.778707	TRUE	3	17	84.3985				N	Y	N
G2	SR1	F3'5'H(gene4387)	UNKNOWN	SYBR	None	23.155	23.3051	0.259629										TRUE	0.778707	TRUE	3	16	84.7294				N	N	N
G3	SR1	F3'5'H(gene4387)	UNKNOWN	SYBR	None	23.1555	23.3051	0.259629										TRUE	0.778707	TRUE	3	16	84.8949				N	N	N
G4	SR2	F3'5'H(gene4387)	UNKNOWN	SYBR	None	28.4813	28.2534	0.229918										TRUE	0.778707	TRUE	3	21	85.0604				N	N	N
G5	SR2	F3'5'H(gene4387)	UNKNOWN	SYBR	None	28.2573	28.2534	0.229918										TRUE	0.778707	TRUE	3	21	85.3914				N	N	N
G6	SR2	F3'5'H(gene4387)	UNKNOWN	SYBR	None	28.0215	28.2534	0.229918										TRUE	0.778707	TRUE	3	21	85.5569				N	N	N
G7	SR3	F3'5'H(gene4387)	UNKNOWN	SYBR	None	22.9371	22.962	0.0368683										TRUE	0.778707	TRUE	3	16	85.7223				N	N	N
G8	SR3	F3'5'H(gene4387)	UNKNOWN	SYBR	None	22.9445	22.962	0.0368683										TRUE	0.778707	TRUE	3	16	85.5569				N	N	N
G9	SR3	F3'5'H(gene4387)	UNKNOWN	SYBR	None	23.0044	22.962	0.0368683										TRUE	0.778707	TRUE	3	16	85.3914				N	N	N
H1	SG1	F3'5'H(gene4387)	UNKNOWN	SYBR	None	26.09	26.0356	0.0471269										TRUE	0.778707	TRUE	3	19	84.3985				N	N	N
H2	SG1	F3'5'H(gene4387)	UNKNOWN	SYBR	None	26.0102	26.0356	0.0471269										TRUE	0.778707	TRUE	3	19	84.564				N	N	N
H3	SG1	F3'5'H(gene4387)	UNKNOWN	SYBR	None	26.0067	26.0356	0.0471269										TRUE	0.778707	TRUE	3	19	84.564				N	N	N
H4	SG2	F3'5'H(gene4387)	UNKNOWN	SYBR	None	26.9413	26.9643	0.031328										TRUE	0.778707	TRUE	3	20	84.7294				N	N	N
H5	SG2	F3'5'H(gene4387)	UNKNOWN	SYBR	None	27	26.9643	0.031328										TRUE	0.778707	TRUE	3	20	85.0604				N	N	N
H6	SG2	F3'5'H(gene4387)	UNKNOWN	SYBR	None	26.9516	26.9643	0.031328										TRUE	0.778707	TRUE	3	20	85.2259				N	N	N
H7	SG3	F3'5'H(gene4387)	UNKNOWN	SYBR	None	25.4597	25.5821	0.116917										TRUE	0.778707	TRUE	3	18	85.3914				N	N	N
H8	SG3	F3'5'H(gene4387)	UNKNOWN	SYBR	None	25.594	25.5821	0.116917										TRUE	0.778707	TRUE	3	19	85.2259				N	N	N
H9	SG3	F3'5'H(gene4387)	UNKNOWN	SYBR	None	25.6927	25.5821	0.116917										TRUE	0.778707	TRUE	3	19	85.0604				N	N	N
Analysis Type	Singleplex
Endogenous Control	18s
RQ Min/Max Confidence Level	95.0
Reference Sample	SR1

## Sheet: ANS
Experiment File Name	D:\1005LILIN\lilin2.eds
Instrument Type	sds7500fast
Passive Reference	ROX
Well	Sample Name	Target Name	Task	Reporter	Quencher	Cт	Cт Mean	Cт SD	Quantity	Normalized Quantity	Normalized Quantity Mean	Normalized Quantity SEM	RQ	RQ Min	RQ Max	Efficiency	Slope	Automatic Ct Threshold	Ct Threshold	Automatic Baseline	Baseline Start	Baseline End	Tm1	Tm2	Tm3	Comments	HIGHSD	NOAMP	EXPFAIL	MTP
A1	SR1	18s	UNKNOWN	SYBR	None	28.422	28.3633	0.0518561										TRUE	0.64868	TRUE	3	21	79.5138				N	N	N	N
A2	SR1	18s	UNKNOWN	SYBR	None	28.3445	28.3633	0.0518561										TRUE	0.64868	TRUE	3	21	79.6815				N	N	N	N
A3	SR1	18s	UNKNOWN	SYBR	None	28.3235	28.3633	0.0518561										TRUE	0.64868	TRUE	3	22	79.8492				N	N	N	N
B1	SR2	18s	UNKNOWN	SYBR	None	28.492	28.2575	0.299192										TRUE	0.64868	TRUE	3	22	79.6815				N	N	N	N
B2	SR2	18s	UNKNOWN	SYBR	None	28.36	28.2575	0.299192										TRUE	0.64868	TRUE	3	22	79.8492				N	N	N	N
B3	SR2	18s	UNKNOWN	SYBR	None	27.9206	28.2575	0.299192										TRUE	0.64868	TRUE	3	21	80.0169				N	N	N	N
C1	SR3	18s	UNKNOWN	SYBR	None	27.8352	27.8679	0.0733641										TRUE	0.64868	TRUE	3	21	79.8492				N	N	N	N
C2	SR3	18s	UNKNOWN	SYBR	None	27.9519	27.8679	0.0733641										TRUE	0.64868	TRUE	3	21	80.0169				N	N	N	N
C3	SR3	18s	UNKNOWN	SYBR	None	27.8166	27.8679	0.0733641										TRUE	0.64868	TRUE	3	21	80.1846				N	N	N	N
D1	SG1	18s	UNKNOWN	SYBR	None	28.7164	28.7512	0.181728										TRUE	0.64868	TRUE	3	22	79.8492				N	N	N	N
D2	SG1	18s	UNKNOWN	SYBR	None	28.9479	28.7512	0.181728										TRUE	0.64868	TRUE	3	22	80.1846				N	N	N	N
D3	SG1	18s	UNKNOWN	SYBR	None	28.5895	28.7512	0.181728										TRUE	0.64868	TRUE	3	22	80.3523				N	N	N	N
E1	SG2	18s	UNKNOWN	SYBR	None	30.4706	30.4213	0.0510175										TRUE	0.64868	TRUE	3	24	79.8492				N	N	N	N
E2	SG2	18s	UNKNOWN	SYBR	None	30.3687	30.4213	0.0510175										TRUE	0.64868	TRUE	3	24	80.0169				N	N	N	N
E3	SG2	18s	UNKNOWN	SYBR	None	30.4247	30.4213	0.0510175										TRUE	0.64868	TRUE	3	24	80.1846				N	N	N	N
F1	SG3	18s	UNKNOWN	SYBR	None	28.6649	28.7031	0.0956315										TRUE	0.64868	TRUE	3	21	79.6815				N	N	N	N
F2	SG3	18s	UNKNOWN	SYBR	None	28.8119	28.7031	0.0956315										TRUE	0.64868	TRUE	3	22	79.8492				N	N	N	N
F3	SG3	18s	UNKNOWN	SYBR	None	28.6325	28.7031	0.0956315										TRUE	0.64868	TRUE	3	22	80.1846				N	N	N	N
A4	SR1	ANS(gene1297)	UNKNOWN	SYBR	None	21.1566	20.5915	0.56491										TRUE	0.490928	TRUE	3	15	84.88				Y	N	N	N
A5	SR1	ANS(gene1297)	UNKNOWN	SYBR	None	20.0268	20.5915	0.56491										TRUE	0.490928	TRUE	3	14	85.2154				Y	N	N	N
A6	SR1	ANS(gene1297)	UNKNOWN	SYBR	None	20.591	20.5915	0.56491										TRUE	0.490928	TRUE	3	14	85.2154				Y	N	N	N
B4	SR2	ANS(gene1297)	UNKNOWN	SYBR	None	22.6547	22.5807	0.0674994										TRUE	0.490928	TRUE	3	17	85.0477				N	N	N	N
B5	SR2	ANS(gene1297)	UNKNOWN	SYBR	None	22.5649	22.5807	0.0674994										TRUE	0.490928	TRUE	3	16	85.0477				N	N	N	N
B6	SR2	ANS(gene1297)	UNKNOWN	SYBR	None	22.5225	22.5807	0.0674994										TRUE	0.490928	TRUE	3	16	85.2154				N	N	N	N
C4	SR3	ANS(gene1297)	UNKNOWN	SYBR	None	19.156	19.0945	0.0592715										TRUE	0.490928	TRUE	3	13	85.3831				N	N	N	N
C5	SR3	ANS(gene1297)	UNKNOWN	SYBR	None	19.0899	19.0945	0.0592715										TRUE	0.490928	TRUE	3	12	85.5508				N	N	N	N
C6	SR3	ANS(gene1297)	UNKNOWN	SYBR	None	19.0377	19.0945	0.0592715										TRUE	0.490928	TRUE	3	12	85.5508				N	N	N	N
D4	SG1	ANS(gene1297)	UNKNOWN	SYBR	None	21.9273	21.6561	0.236245										TRUE	0.490928	TRUE	3	16	85.2154				N	N	N	N
D5	SG1	ANS(gene1297)	UNKNOWN	SYBR	None	21.4945	21.6561	0.236245										TRUE	0.490928	TRUE	3	15	85.5508				N	N	N	N
D6	SG1	ANS(gene1297)	UNKNOWN	SYBR	None	21.5467	21.6561	0.236245										TRUE	0.490928	TRUE	3	15	85.7185				N	N	N	N
E4	SG2	ANS(gene1297)	UNKNOWN	SYBR	None	24.0679	24.1053	0.0376258										TRUE	0.490928	TRUE	3	18	85.5508				N	N	N	N
E5	SG2	ANS(gene1297)	UNKNOWN	SYBR	None	24.1432	24.1053	0.0376258										TRUE	0.490928	TRUE	3	18	85.8862				N	N	N	N
E6	SG2	ANS(gene1297)	UNKNOWN	SYBR	None	24.105	24.1053	0.0376258										TRUE	0.490928	TRUE	3	18	85.8862				N	N	N	N
F4	SG3	ANS(gene1297)	UNKNOWN	SYBR	None	22.4945	22.4679	0.0961578										TRUE	0.490928	TRUE	3	16	85.3831				N	N	N	N
F5	SG3	ANS(gene1297)	UNKNOWN	SYBR	None	22.548	22.4679	0.0961578										TRUE	0.490928	TRUE	3	16	85.5508				N	N	N	N
F6	SG3	ANS(gene1297)	UNKNOWN	SYBR	None	22.3613	22.4679	0.0961578										TRUE	0.490928	TRUE	3	16	85.7185				N	N	N	N

## Sheet: UFGT
Block Type	96fast
Chemistry	SYBR_GREEN
Experiment Run End Time	2020-12-23 11:52:38 AM PST
Instrument Type	sds7500fast
Passive Reference	ROX
Well	Sample Name	Target Name	Task	Reporter	Quencher	Cт	Cт Mean	Cт SD	Quantity	Normalized Quantity	Normalized Quantity Mean	Normalized Quantity SEM	RQ	RQ Min	RQ Max	Efficiency	Slope	Automatic Ct Threshold	Ct Threshold	Automatic Baseline	Baseline Start	Baseline End	Tm1	Tm2	Tm3	Comments	HIGHSD	OUTLIERRG	MTP
A1	SG1	18S	UNKNOWN	SYBR	None	27.0611	26.8539	0.925655										TRUE	0.536821	TRUE	3	20	79.2492				Y	N	N
A2	SG1	18S	UNKNOWN	SYBR	None	25.8422	26.8539	0.925655										TRUE	0.536821	TRUE	3	19	79.2492				Y	N	N
A3	SG1	18S	UNKNOWN	SYBR	None	27.6584	26.8539	0.925655										TRUE	0.536821	TRUE	3	21	79.6011				Y	N	N
B1	SG2	18S	UNKNOWN	SYBR	None	25.9115	26.6051	1.33926										TRUE	0.536821	TRUE	3	19	79.4251				Y	N	N
B2	SG2	18S	UNKNOWN	SYBR	None	25.7548	26.6051	1.33926										TRUE	0.536821	TRUE	3	20	79.4251				Y	N	N
B3	SG2	18S	UNKNOWN	SYBR	None	28.1489	26.6051	1.33926										TRUE	0.536821	TRUE	3	22	79.777				Y	N	N
C1	SG3	18S	UNKNOWN	SYBR	None	25.3391	26.82	1.75141										TRUE	0.536821	TRUE	3	19	79.6011				Y	N	N
C2	SG3	18S	UNKNOWN	SYBR	None	26.3676	26.82	1.75141										TRUE	0.536821	TRUE	3	20	79.777				Y	N	N
C3	SG3	18S	UNKNOWN	SYBR	None	28.7532	26.82	1.75141										TRUE	0.536821	TRUE	3	23	80.1289				Y	N	N
D1	SR1	18S	UNKNOWN	SYBR	None	28.0325	27.0413	1.02802										TRUE	0.536821	TRUE	3	22	79.777				Y	N	N
D2	SR1	18S	UNKNOWN	SYBR	None	27.1114	27.0413	1.02802										TRUE	0.536821	TRUE	3	21	79.9529				Y	N	N
D3	SR1	18S	UNKNOWN	SYBR	None	25.9801	27.0413	1.02802										TRUE	0.536821	TRUE	3	19	79.9529				Y	N	N
E1	SR2	18S	UNKNOWN	SYBR	None	26.4001	26.0361	0.363898										TRUE	0.536821	TRUE	3	20	79.777				N	N	N
E2	SR2	18S	UNKNOWN	SYBR	None	26.036	26.0361	0.363898										TRUE	0.536821	TRUE	3	19	79.9529				N	N	N
E3	SR2	18S	UNKNOWN	SYBR	None	25.6723	26.0361	0.363898										TRUE	0.536821	TRUE	3	19	80.1289				N	N	N
F1	SR3	18S	UNKNOWN	SYBR	None	27.6028	27.2288	0.460675										TRUE	0.536821	TRUE	3	21	79.4251				N	N	N
F2	SR3	18S	UNKNOWN	SYBR	None	26.7142	27.2288	0.460675										TRUE	0.536821	TRUE	3	20	79.4251				N	N	N
F3	SR3	18S	UNKNOWN	SYBR	None	27.3693	27.2288	0.460675										TRUE	0.536821	TRUE	3	21	80.1289				N	N	N
A4	SG1	UFGT(gene35144)	UNKNOWN	SYBR	None	26.771	30.2259	4.97834										TRUE	0.455515	TRUE	3	21	82.9438				Y	N	N
A5	SG1	UFGT(gene35144)	UNKNOWN	SYBR	None	35.9323	30.2259	4.97834										TRUE	0.455515	TRUE	3	30	79.2492				Y	N	N
A6	SG1	UFGT(gene35144)	UNKNOWN	SYBR	None	27.9745	30.2259	4.97834										TRUE	0.455515	TRUE	3	21	83.4717				Y	N	N
B4	SG2	UFGT(gene35144)	UNKNOWN	SYBR	None	26.9873	27.074	0.116507										TRUE	0.455515	TRUE	3	21	83.4717				N	N	N
B5	SG2	UFGT(gene35144)	UNKNOWN	SYBR	None	27.0284	27.074	0.116507										TRUE	0.455515	TRUE	3	20	83.4717				N	N	N
B6	SG2	UFGT(gene35144)	UNKNOWN	SYBR	None	27.2065	27.074	0.116507										TRUE	0.455515	TRUE	3	21	83.6476				N	N	N
C4	SG3	UFGT(gene35144)	UNKNOWN	SYBR	None	26.3266	26.2345	0.219098										TRUE	0.455515	TRUE	3	20	83.6476				N	N	N
C5	SG3	UFGT(gene35144)	UNKNOWN	SYBR	None	26.3925	26.2345	0.219098										TRUE	0.455515	TRUE	3	20	83.8235				N	N	N
C6	SG3	UFGT(gene35144)	UNKNOWN	SYBR	None	25.9844	26.2345	0.219098										TRUE	0.455515	TRUE	3	20	83.9995				N	N	N
D4	SR1	UFGT(gene35144)	UNKNOWN	SYBR	None	26.0727	26.1003	0.293908										TRUE	0.455515	TRUE	3	20	83.9995				N	N	N
D5	SR1	UFGT(gene35144)	UNKNOWN	SYBR	None	25.8211	26.1003	0.293908										TRUE	0.455515	TRUE	3	19	84.1754				N	N	N
D6	SR1	UFGT(gene35144)	UNKNOWN	SYBR	None	26.407	26.1003	0.293908										TRUE	0.455515	TRUE	3	20	84.1754				N	N	N
E4	SR2	UFGT(gene35144)	UNKNOWN	SYBR	None	26.2047	26.0151	0.69627										TRUE	0.455515	TRUE	3	19	83.8235				Y	N	N
E5	SR2	UFGT(gene35144)	UNKNOWN	SYBR	None	26.597	26.0151	0.69627										TRUE	0.455515	TRUE	3	20	84.1754				Y	N	N
E6	SR2	UFGT(gene35144)	UNKNOWN	SYBR	None	25.2437	26.0151	0.69627										TRUE	0.455515	TRUE	3	19	84.1754	79.6011			Y	N	Y
F4	SR3	UFGT(gene35144)	UNKNOWN	SYBR	None	26.2758	26.2283	0.071432										TRUE	0.455515	TRUE	3	20	83.8235				N	N	N
F5	SR3	UFGT(gene35144)	UNKNOWN	SYBR	None	26.1462	26.2283	0.071432										TRUE	0.455515	TRUE	3	20	83.9995				N	N	N
F6	SR3	UFGT(gene35144)	UNKNOWN	SYBR	None	26.263	26.2283	0.071432										TRUE	0.455515	TRUE	3	20	84.3513				N	N	N
A7	SG1	UFGT(gene35146)	UNKNOWN	SYBR	None	28.2168	27.7977	0.494791										TRUE	0.644718	TRUE	3	21	86.1107	77.8417			N	N	Y
A8	SG1	UFGT(gene35146)	UNKNOWN	SYBR	None	27.9245	27.7977	0.494791										TRUE	0.644718	TRUE	3	21	86.1107	75.7305			N	N	Y
A9	SG1	UFGT(gene35146)	UNKNOWN	SYBR	None	27.2519	27.7977	0.494791										TRUE	0.644718	TRUE	3	20	85.9348	76.6102			N	N	Y
B7	SG2	UFGT(gene35146)	UNKNOWN	SYBR	None	27.5761	27.6909	0.359198										TRUE	0.644718	TRUE	3	20	86.2866	77.138			N	N	Y
B8	SG2	UFGT(gene35146)	UNKNOWN	SYBR	None	27.4032	27.6909	0.359198										TRUE	0.644718	TRUE	3	21	86.2866				N	N	N
B9	SG2	UFGT(gene35146)	UNKNOWN	SYBR	None	28.0935	27.6909	0.359198										TRUE	0.644718	TRUE	3	21	86.2866				N	N	N
C7	SG3	UFGT(gene35146)	UNKNOWN	SYBR	None	28.1504	27.3441	0.719284										TRUE	0.644718	TRUE	3	22	86.6385				Y	N	N
C8	SG3	UFGT(gene35146)	UNKNOWN	SYBR	None	27.1135	27.3441	0.719284										TRUE	0.644718	TRUE	3	20	86.6385				Y	N	N
C9	SG3	UFGT(gene35146)	UNKNOWN	SYBR	None	26.7683	27.3441	0.719284										TRUE	0.644718	TRUE	3	20	86.4626				Y	N	N
D7	SR1	UFGT(gene35146)	UNKNOWN	SYBR	None	27.4933	27.3418	0.133947										TRUE	0.644718	TRUE	3	20	86.9904				N	N	N
D8	SR1	UFGT(gene35146)	UNKNOWN	SYBR	None	27.2389	27.3418	0.133947										TRUE	0.644718	TRUE	3	20	86.6385				N	N	N
D9	SR1	UFGT(gene35146)	UNKNOWN	SYBR	None	27.2933	27.3418	0.133947										TRUE	0.644718	TRUE	3	21	86.6385	76.0824			N	N	Y
E7	SR2	UFGT(gene35146)	UNKNOWN	SYBR	None	27.2493	27.0651	0.976841										TRUE	0.644718	TRUE	3	21	86.8144	76.6102			Y	N	Y
E8	SR2	UFGT(gene35146)	UNKNOWN	SYBR	None	27.9367	27.0651	0.976841										TRUE	0.644718	TRUE	3	21	86.6385	76.6102			Y	N	Y
E9	SR2	UFGT(gene35146)	UNKNOWN	SYBR	None	26.0093	27.0651	0.976841										TRUE	0.644718	TRUE	3	19	76.7861	86.4626			Y	N	Y
F7	SR3	UFGT(gene35146)	UNKNOWN	SYBR	None	27.9557	27.6952	0.228453										TRUE	0.644718	TRUE	3	21	86.9904				N	N	N
F8	SR3	UFGT(gene35146)	UNKNOWN	SYBR	None	27.6011	27.6952	0.228453										TRUE	0.644718	TRUE	3	20	86.6385	76.4342			N	N	Y
F9	SR3	UFGT(gene35146)	UNKNOWN	SYBR	None	27.5289	27.6952	0.228453										TRUE	0.644718	TRUE	3	21	86.6385				N	N	N
A10	SG1	UFGT(gene1807)	UNKNOWN	SYBR	None	23.0246	23.3674	0.298369										TRUE	0.606477	TRUE	3	16	84.3513				N	N	N
A11	SG1	UFGT(gene1807)	UNKNOWN	SYBR	None	23.569	23.3674	0.298369										TRUE	0.606477	TRUE	3	17	84.1754				N	N	N
A12	SG1	UFGT(gene1807)	UNKNOWN	SYBR	None	23.5085	23.3674	0.298369										TRUE	0.606477	TRUE	3	16	84.1754				N	N	N
B10	SG2	UFGT(gene1807)	UNKNOWN	SYBR	None	22.8032	22.01	0.94858										TRUE	0.606477	TRUE	3	16	84.5273				Y	N	N
B11	SG2	UFGT(gene1807)	UNKNOWN	SYBR	None	20.9592	22.01	0.94858										TRUE	0.606477	TRUE	3	14	84.5273				Y	N	N
B12	SG2	UFGT(gene1807)	UNKNOWN	SYBR	None	22.2675	22.01	0.94858										TRUE	0.606477	TRUE	3	15	84.1754				Y	N	N
C10	SG3	UFGT(gene1807)	UNKNOWN	SYBR	None	21.9731	21.479	0.505195										TRUE	0.606477	TRUE	3	15	84.8791				Y	N	N
C11	SG3	UFGT(gene1807)	UNKNOWN	SYBR	None	21.5005	21.479	0.505195										TRUE	0.606477	TRUE	3	15	84.5273				Y	N	N
C12	SG3	UFGT(gene1807)	UNKNOWN	SYBR	None	20.9634	21.479	0.505195										TRUE	0.606477	TRUE	3	14	84.3513				Y	N	N
D10	SR1	UFGT(gene1807)	UNKNOWN	SYBR	None	21.3273	21.4611	0.226978										TRUE	0.606477	TRUE	3	14	85.0551				N	N	N
D11	SR1	UFGT(gene1807)	UNKNOWN	SYBR	None	21.7232	21.4611	0.226978										TRUE	0.606477	TRUE	3	15	84.7032				N	Y	N
D12	SR1	UFGT(gene1807)	UNKNOWN	SYBR	None	21.3329	21.4611	0.226978										TRUE	0.606477	TRUE	3	15	84.5273				N	N	N
E10	SR2	UFGT(gene1807)	UNKNOWN	SYBR	None	20.9595	21.2638	0.455642										TRUE	0.606477	TRUE	3	14	85.0551				N	N	N
E11	SR2	UFGT(gene1807)	UNKNOWN	SYBR	None	21.0443	21.2638	0.455642										TRUE	0.606477	TRUE	3	14	84.7032				N	N	N
E12	SR2	UFGT(gene1807)	UNKNOWN	SYBR	None	21.7877	21.2638	0.455642										TRUE	0.606477	TRUE	3	15	84.5273				N	N	N
F10	SR3	UFGT(gene1807)	UNKNOWN	SYBR	None	22.1513	21.91	0.240899										TRUE	0.606477	TRUE	3	16	84.8791				N	N	N
F11	SR3	UFGT(gene1807)	UNKNOWN	SYBR	None	21.6695	21.91	0.240899										TRUE	0.606477	TRUE	3	15	84.7032				N	N	N
F12	SR3	UFGT(gene1807)	UNKNOWN	SYBR	None	21.9093	21.91	0.240899										TRUE	0.606477	TRUE	3	15	84.5273				N	N	N
G1	SG1	UFGT(gene35048)	UNKNOWN	SYBR	None	27.1548	26.0498	0.959282										TRUE	0.720576	TRUE	3	20	83.1198				Y	N	N
G2	SG1	UFGT(gene35048)	UNKNOWN	SYBR	None	25.5646	26.0498	0.959282										TRUE	0.720576	TRUE	3	19	83.2957	76.962			Y	N	Y
G3	SG1	UFGT(gene35048)	UNKNOWN	SYBR	None	25.43	26.0498	0.959282										TRUE	0.720576	TRUE	3	18	77.6658	83.4717			Y	N	Y
G4	SG2	UFGT(gene35048)	UNKNOWN	SYBR	None	26.9242	26.1381	0.707907										TRUE	0.720576	TRUE	3	20	83.8235	77.3139			Y	N	Y
G5	SG2	UFGT(gene35048)	UNKNOWN	SYBR	None	25.551	26.1381	0.707907										TRUE	0.720576	TRUE	3	19	83.9995	77.8417			Y	N	Y
G6	SG2	UFGT(gene35048)	UNKNOWN	SYBR	None	25.9391	26.1381	0.707907										TRUE	0.720576	TRUE	3	19	84.3513	77.8417			Y	N	Y
G7	SG3	UFGT(gene35048)	UNKNOWN	SYBR	None	26.7892	26.4869	0.542504										TRUE	0.720576	TRUE	3	20	84.3513	77.6658			Y	N	Y
G8	SG3	UFGT(gene35048)	UNKNOWN	SYBR	None	25.8606	26.4869	0.542504										TRUE	0.720576	TRUE	3	19	83.9995	78.0176			Y	Y	Y
G9	SG3	UFGT(gene35048)	UNKNOWN	SYBR	None	26.8109	26.4869	0.542504										TRUE	0.720576	TRUE	3	20	83.9995	77.3139			Y	N	Y
H1	SR1	UFGT(gene35048)	UNKNOWN	SYBR	None	27.8638	26.8292	1.49405										TRUE	0.720576	TRUE	3	21	82.9438	76.4342			Y	N	Y
H2	SR1	UFGT(gene35048)	UNKNOWN	SYBR	None	27.5074	26.8292	1.49405										TRUE	0.720576	TRUE	3	20	82.9438	76.6102			Y	N	Y
H3	SR1	UFGT(gene35048)	UNKNOWN	SYBR	None	25.1163	26.8292	1.49405										TRUE	0.720576	TRUE	3	18	77.3139	82.9438			Y	N	Y
H4	SR2	UFGT(gene35048)	UNKNOWN	SYBR	None	25.5026	25.8068	0.495612										TRUE	0.720576	TRUE	3	18	83.4717	76.962			N	N	Y
H5	SR2	UFGT(gene35048)	UNKNOWN	SYBR	None	25.5391	25.8068	0.495612										TRUE	0.720576	TRUE	3	18	83.8235				N	N	N
H6	SR2	UFGT(gene35048)	UNKNOWN	SYBR	None	26.3787	25.8068	0.495612										TRUE	0.720576	TRUE	3	19	84.1754				N	N	N
H7	SR3	UFGT(gene35048)	UNKNOWN	SYBR	None	26.3208	27.0985	0.907145										TRUE	0.720576	TRUE	3	19	83.9995	77.4898			Y	N	Y
H8	SR3	UFGT(gene35048)	UNKNOWN	SYBR	None	26.8796	27.0985	0.907145										TRUE	0.720576	TRUE	3	19	83.8235	77.3139			Y	N	Y
H9	SR3	UFGT(gene35048)	UNKNOWN	SYBR	None	28.095	27.0985	0.907145										TRUE	0.720576	TRUE	3	21	83.9995				Y	N	N
Analysis Type	Singleplex
Endogenous Control	18S
RQ Min/Max Confidence Level	95.0
Reference Sample	G1

## Sheet: UFGT2
Block Type	96fast
Chemistry	SYBR_GREEN
Experiment Run End Time	2020-05-27 13:17:55 PM PDT
Instrument Type	sds7500fast
Passive Reference	ROX
Well	Sample Name	Target Name	Task	Reporter	Quencher	Cт	Cт Mean	Cт SD	Quantity	Normalized Quantity	Normalized Quantity Mean	Normalized Quantity SEM	RQ	RQ Min	RQ Max	Efficiency	Slope	Automatic Ct Threshold	Ct Threshold	Automatic Baseline	Baseline Start	Baseline End	Tm1	Tm2	Tm3	Comments	HIGHSD	OUTLIERRG	MTP
A1	SG1	18s	UNKNOWN	SYBR	None	20.9778	21.2657	0.548956										TRUE	0.649477	TRUE	3	14	83.0692				Y	N	N
A2	SG1	18s	UNKNOWN	SYBR	None	20.9205	21.2657	0.548956										TRUE	0.649477	TRUE	3	14	83.2385				Y	N	N
A3	SG1	18s	UNKNOWN	SYBR	None	21.8987	21.2657	0.548956										TRUE	0.649477	TRUE	3	15	83.2385				Y	N	N
B1	SG2	18s	UNKNOWN	SYBR	None	20.667	20.61	0.100532										TRUE	0.649477	TRUE	3	14	83.2385				N	N	N
B2	SG2	18s	UNKNOWN	SYBR	None	20.4939	20.61	0.100532										TRUE	0.649477	TRUE	3	13	83.4077				N	N	N
B3	SG2	18s	UNKNOWN	SYBR	None	20.6691	20.61	0.100532										TRUE	0.649477	TRUE	3	14	83.5769				N	N	N
C1	SG3	18s	UNKNOWN	SYBR	None	20.516	20.5658	0.0687524										TRUE	0.649477	TRUE	3	13	83.4077				N	N	N
C2	SG3	18s	UNKNOWN	SYBR	None	20.5372	20.5658	0.0687524										TRUE	0.649477	TRUE	3	13	83.5769				N	N	N
C3	SG3	18s	UNKNOWN	SYBR	None	20.6442	20.5658	0.0687524										TRUE	0.649477	TRUE	3	13	83.9154				N	N	N
D1	SR1	18s	UNKNOWN	SYBR	None	20.5299	20.4817	0.0615215										TRUE	0.649477	TRUE	3	13	83.5769				N	N	N
D2	SR1	18s	UNKNOWN	SYBR	None	20.4124	20.4817	0.0615215										TRUE	0.649477	TRUE	3	13	83.7462				N	N	N
D3	SR1	18s	UNKNOWN	SYBR	None	20.5028	20.4817	0.0615215										TRUE	0.649477	TRUE	3	13	83.9154				N	N	N
E1	SR2	18s	UNKNOWN	SYBR	None	20.4024	20.3809	0.0425895										TRUE	0.649477	TRUE	3	13	83.5769				N	N	N
E2	SR2	18s	UNKNOWN	SYBR	None	20.4084	20.3809	0.0425895										TRUE	0.649477	TRUE	3	14	83.7462				N	N	N
E3	SR2	18s	UNKNOWN	SYBR	None	20.3318	20.3809	0.0425895										TRUE	0.649477	TRUE	3	13	83.9154				N	N	N
F1	SR3	18s	UNKNOWN	SYBR	None	19.8629	19.923	0.0918063										TRUE	0.649477	TRUE	3	13	83.2385				N	N	N
F2	SR3	18s	UNKNOWN	SYBR	None	20.0287	19.923	0.0918063										TRUE	0.649477	TRUE	3	13	83.5769				N	N	N
F3	SR3	18s	UNKNOWN	SYBR	None	19.8776	19.923	0.0918063										TRUE	0.649477	TRUE	3	13	83.9154				N	N	N
A4	SG1	UFGT(gene28510)	UNKNOWN	SYBR	None	21.8252	21.8518	0.0806648										TRUE	0.847853	TRUE	3	14	83.2385				N	N	N
A5	SG1	UFGT(gene28510)	UNKNOWN	SYBR	None	21.9424	21.8518	0.0806648										TRUE	0.847853	TRUE	3	14	83.4077				N	N	N
A6	SG1	UFGT(gene28510)	UNKNOWN	SYBR	None	21.7879	21.8518	0.0806648										TRUE	0.847853	TRUE	3	14	83.5769				N	N	N
B4	SG2	UFGT(gene28510)	UNKNOWN	SYBR	None	22.3156	22.2954	0.0442771										TRUE	0.847853	TRUE	3	15	83.5769				N	N	N
B5	SG2	UFGT(gene28510)	UNKNOWN	SYBR	None	22.2446	22.2954	0.0442771										TRUE	0.847853	TRUE	3	15	83.7462				N	N	N
B6	SG2	UFGT(gene28510)	UNKNOWN	SYBR	None	22.3259	22.2954	0.0442771										TRUE	0.847853	TRUE	3	15	83.7462				N	N	N
C4	SG3	UFGT(gene28510)	UNKNOWN	SYBR	None	21.9224	21.8606	0.105172										TRUE	0.847853	TRUE	3	14	83.7462				N	N	N
C5	SG3	UFGT(gene28510)	UNKNOWN	SYBR	None	21.7392	21.8606	0.105172										TRUE	0.847853	TRUE	3	14	83.9154				N	N	N
C6	SG3	UFGT(gene28510)	UNKNOWN	SYBR	None	21.9203	21.8606	0.105172										TRUE	0.847853	TRUE	3	14	84.0846				N	N	N
D4	SR1	UFGT(gene28510)	UNKNOWN	SYBR	None	21.5089	21.6109	0.0979614										TRUE	0.847853	TRUE	3	14	83.9154				N	N	N
D5	SR1	UFGT(gene28510)	UNKNOWN	SYBR	None	21.7043	21.6109	0.0979614										TRUE	0.847853	TRUE	3	14	84.0846				N	N	N
D6	SR1	UFGT(gene28510)	UNKNOWN	SYBR	None	21.6194	21.6109	0.0979614										TRUE	0.847853	TRUE	3	14	84.2538				N	N	N
E4	SR2	UFGT(gene28510)	UNKNOWN	SYBR	None	21.341	21.2573	0.137873										TRUE	0.847853	TRUE	3	13	83.9154				N	N	N
E5	SR2	UFGT(gene28510)	UNKNOWN	SYBR	None	21.3327	21.2573	0.137873										TRUE	0.847853	TRUE	3	14	84.0846				N	N	N
E6	SR2	UFGT(gene28510)	UNKNOWN	SYBR	None	21.0981	21.2573	0.137873										TRUE	0.847853	TRUE	3	14	84.2538				N	N	N
F4	SR3	UFGT(gene28510)	UNKNOWN	SYBR	None	21.4589	21.4229	0.0927842										TRUE	0.847853	TRUE	3	14	83.7462				N	N	N
F5	SR3	UFGT(gene28510)	UNKNOWN	SYBR	None	21.4922	21.4229	0.0927842										TRUE	0.847853	TRUE	3	14	84.0846				N	N	N
F6	SR3	UFGT(gene28510)	UNKNOWN	SYBR	None	21.3175	21.4229	0.0927842										TRUE	0.847853	TRUE	3	14	84.2538				N	N	N
G1	SG1	UFGT(gene1697)	UNKNOWN	SYBR	None	25.9258	25.8567	0.150704										TRUE	0.824202	TRUE	3	18	84.7615				N	N	N
G2	SG1	UFGT(gene1697)	UNKNOWN	SYBR	None	25.9606	25.8567	0.150704										TRUE	0.824202	TRUE	3	18	84.9308				N	N	N
G3	SG1	UFGT(gene1697)	UNKNOWN	SYBR	None	25.6839	25.8567	0.150704										TRUE	0.824202	TRUE	3	18	85.1				N	N	N
G4	SG2	UFGT(gene1697)	UNKNOWN	SYBR	None	24.8698	24.7738	0.148341										TRUE	0.824202	TRUE	3	18	85.2692				N	N	N
G5	SG2	UFGT(gene1697)	UNKNOWN	SYBR	None	24.8488	24.7738	0.148341										TRUE	0.824202	TRUE	3	18	85.6077				N	N	N
G6	SG2	UFGT(gene1697)	UNKNOWN	SYBR	None	24.603	24.7738	0.148341										TRUE	0.824202	TRUE	3	18	85.7769				N	N	N
G7	SG3	UFGT(gene1697)	UNKNOWN	SYBR	None	24.7847	24.7265	0.0578197										TRUE	0.824202	TRUE	3	17	85.7769				N	N	N
G8	SG3	UFGT(gene1697)	UNKNOWN	SYBR	None	24.669	24.7265	0.0578197										TRUE	0.824202	TRUE	3	17	85.6077				N	N	N
G9	SG3	UFGT(gene1697)	UNKNOWN	SYBR	None	24.7258	24.7265	0.0578197										TRUE	0.824202	TRUE	3	18	85.4385				N	N	N
G10	SR1	UFGT(gene1697)	UNKNOWN	SYBR	None	23.8507	24.145	0.258786										TRUE	0.824202	TRUE	3	16	85.2692				N	N	N
G11	SR1	UFGT(gene1697)	UNKNOWN	SYBR	None	24.3372	24.145	0.258786										TRUE	0.824202	TRUE	3	17	85.2692				N	N	N
G12	SR1	UFGT(gene1697)	UNKNOWN	SYBR	None	24.247	24.145	0.258786										TRUE	0.824202	TRUE	3	17	85.1				N	N	N
H1	SR2	UFGT(gene1697)	UNKNOWN	SYBR	None	24.9362	24.8643	0.0692437										TRUE	0.824202	TRUE	3	18	84.7615				N	N	N
H2	SR2	UFGT(gene1697)	UNKNOWN	SYBR	None	24.8586	24.8643	0.0692437										TRUE	0.824202	TRUE	3	18	84.7615				N	N	N
H3	SR2	UFGT(gene1697)	UNKNOWN	SYBR	None	24.7981	24.8643	0.0692437										TRUE	0.824202	TRUE	3	17	84.9308				N	N	N
H4	SR3	UFGT(gene1697)	UNKNOWN	SYBR	None	24.7991	24.7011	0.0867656										TRUE	0.824202	TRUE	3	17	85.1				N	N	N
H5	SR3	UFGT(gene1697)	UNKNOWN	SYBR	None	24.6339	24.7011	0.0867656										TRUE	0.824202	TRUE	3	17	85.2692				N	N	N
H6	SR3	UFGT(gene1697)	UNKNOWN	SYBR	None	24.6703	24.7011	0.0867656										TRUE	0.824202	TRUE	3	17	85.4385				N	N	N
Analysis Type	Singleplex
Endogenous Control	ACTIN
RQ Min/Max Confidence Level	95.0
Reference Sample	1

## Sheet: UFGT3
Well	Sample Name	Target Name	Task	Reporter	Quencher	Cт	Cт Mean	Cт SD	Quantity	Normalized Quantity	Normalized Quantity Mean	Normalized Quantity SEM	RQ	RQ Min	RQ Max	Efficiency	Slope	Automatic Ct Threshold	Ct Threshold	Automatic Baseline	Baseline Start	Baseline End	Tm1	Tm2	Tm3	Comments	HIGHSD	OUTLIERRG	MTP
A1	SG1	18s	UNKNOWN	SYBR	None	21.1958	21.1214	0.0968187										TRUE	0.679875	TRUE	3	14	83.1426				N	N	N
A2	SG1	18s	UNKNOWN	SYBR	None	21.1566	21.1214	0.0968187										TRUE	0.679875	TRUE	3	14	83.1426				N	N	N
A3	SG1	18s	UNKNOWN	SYBR	None	21.012	21.1214	0.0968187										TRUE	0.679875	TRUE	3	14	83.4746				N	N	N
B1	SG2	18s	UNKNOWN	SYBR	None	20.5241	20.6959	0.209736										TRUE	0.679875	TRUE	3	14	83.1426				N	N	N
B2	SG2	18s	UNKNOWN	SYBR	None	20.9296	20.6959	0.209736										TRUE	0.679875	TRUE	3	14	83.4746				N	N	N
B3	SG2	18s	UNKNOWN	SYBR	None	20.6341	20.6959	0.209736										TRUE	0.679875	TRUE	3	14	83.6406				N	N	N
C1	SG3	18s	UNKNOWN	SYBR	None	20.8028	20.663	0.151264										TRUE	0.679875	TRUE	3	14	83.3086				N	N	N
C2	SG3	18s	UNKNOWN	SYBR	None	20.6837	20.663	0.151264										TRUE	0.679875	TRUE	3	14	83.6406				N	N	N
C3	SG3	18s	UNKNOWN	SYBR	None	20.5024	20.663	0.151264										TRUE	0.679875	TRUE	3	14	83.9726				N	N	N
D1	SR1	18s	UNKNOWN	SYBR	None	20.8086	20.7183	0.0916091										TRUE	0.679875	TRUE	3	14	83.6406				N	N	N
D2	SR1	18s	UNKNOWN	SYBR	None	20.721	20.7183	0.0916091										TRUE	0.679875	TRUE	3	13	83.8066				N	N	N
D3	SR1	18s	UNKNOWN	SYBR	None	20.6254	20.7183	0.0916091										TRUE	0.679875	TRUE	3	14	84.1386				N	N	N
E1	SR2	18s	UNKNOWN	SYBR	None	20.6094	20.5115	0.163227										TRUE	0.679875	TRUE	3	13	83.4746				N	N	N
E2	SR2	18s	UNKNOWN	SYBR	None	20.6021	20.5115	0.163227										TRUE	0.679875	TRUE	3	13	83.8066				N	N	N
E3	SR2	18s	UNKNOWN	SYBR	None	20.3231	20.5115	0.163227										TRUE	0.679875	TRUE	3	13	83.9726				N	N	N
F1	SR3	18s	UNKNOWN	SYBR	None	20.2232	19.8211	0.571943										TRUE	0.679875	TRUE	3	13	83.3086				Y	N	N
F2	SR3	18s	UNKNOWN	SYBR	None	20.0738	19.8211	0.571943										TRUE	0.679875	TRUE	3	13	83.6406				Y	N	N
F3	SR3	18s	UNKNOWN	SYBR	None	19.1664	19.8211	0.571943										TRUE	0.679875	TRUE	3	12	83.8066				Y	N	N
G1	SG1	UFGT（gene24302)	UNKNOWN	SYBR	None	32.5349	33.4721	3.20347										TRUE	0.171217	TRUE	3	28	73.6812				Y	N	N
G2	SG1	UFGT（gene24302)	UNKNOWN	SYBR	None	37.0396	33.4721	3.20347										TRUE	0.171217	TRUE	3	32	72.8513				Y	N	N
G3	SG1	UFGT（gene24302)	UNKNOWN	SYBR	None	30.8417	33.4721	3.20347										TRUE	0.171217	TRUE	3	26	73.8472				Y	N	N
G4	SG2	UFGT（gene24302)	UNKNOWN	SYBR	None	33.7062	32.2565	1.35947										TRUE	0.171217	TRUE	3	29	74.0132				Y	N	N
G5	SG2	UFGT（gene24302)	UNKNOWN	SYBR	None	32.0532	32.2565	1.35947										TRUE	0.171217	TRUE	3	27	74.0132				Y	N	N
G6	SG2	UFGT（gene24302)	UNKNOWN	SYBR	None	31.0102	32.2565	1.35947										TRUE	0.171217	TRUE	3	26	74.0132	80.4868			Y	N	Y
G7	SG3	UFGT（gene24302)	UNKNOWN	SYBR	None	32.1069	29.7884	2.1877										TRUE	0.171217	TRUE	3	27	76.1711				Y	N	N
G8	SG3	UFGT（gene24302)	UNKNOWN	SYBR	None	27.7606	29.7884	2.1877										TRUE	0.171217	TRUE	3	22	75.6731	80.6528			Y	N	Y
G9	SG3	UFGT（gene24302)	UNKNOWN	SYBR	None	29.4979	29.7884	2.1877										TRUE	0.171217	TRUE	3	25	74.5112	80.4868			Y	N	Y
G10	SR1	UFGT（gene24302)	UNKNOWN	SYBR	None	29.2209	27.0097	1.94837										TRUE	0.171217	TRUE	3	24	74.0132	79.8228			Y	N	Y
G11	SR1	UFGT（gene24302)	UNKNOWN	SYBR	None	25.5449	27.0097	1.94837										TRUE	0.171217	TRUE	3	21	74.1792				Y	N	N
G12	SR1	UFGT（gene24302)	UNKNOWN	SYBR	None	26.2633	27.0097	1.94837										TRUE	0.171217	TRUE	3	21	74.1792				Y	N	N
H1	SR2	UFGT（gene24302)	UNKNOWN	SYBR	None	29.0539	30.0333	2.73937										TRUE	0.171217	TRUE	3	24	73.1833	82.1467			Y	N	Y
H2	SR2	UFGT（gene24302)	UNKNOWN	SYBR	None	27.9182	30.0333	2.73937										TRUE	0.171217	TRUE	3	23	79.3249	73.1833			Y	N	Y
H3	SR2	UFGT（gene24302)	UNKNOWN	SYBR	None	33.1278	30.0333	2.73937										TRUE	0.171217	TRUE	3	29	72.8513	82.9767			Y	N	Y
H4	SR3	UFGT（gene24302)	UNKNOWN	SYBR	None	36.2931	33.1033	2.76619										TRUE	0.171217	TRUE	3	31	73.6812				Y	N	N
H5	SR3	UFGT（gene24302)	UNKNOWN	SYBR	None	31.6522	33.1033	2.76619										TRUE	0.171217	TRUE	3	27	74.6772				Y	N	N
H6	SR3	UFGT（gene24302)	UNKNOWN	SYBR	None	31.3646	33.1033	2.76619										TRUE	0.171217	TRUE	3	26	75.3411				Y	N	N
Analysis Type	Singleplex
Endogenous Control	24302
RQ Min/Max Confidence Level	95.0
Reference Sample	1

## Sheet: ANR LAR
Block Type	96fast
Chemistry	SYBR_GREEN
Experiment Run End Time	2021-09-24 16:57:55 下午 CST
Instrument Type	sds7500fast
Passive Reference	ROX
Well	Sample Name	Target Name	Task	Reporter	Quencher	Cт	Cт Mean	Cт SD	Quantity	Normalized Quantity	Normalized Quantity Mean	Normalized Quantity SEM	RQ	RQ Min	RQ Max	Efficiency	Slope	Automatic Ct Threshold	Ct Threshold	Automatic Baseline	Baseline Start	Baseline End	Tm1	Tm2	Tm3	Comments	HIGHSD	OUTLIERRG	MTP
A1	SR1	18S	UNKNOWN	SYBR	None	31.5419	31.2096	0.371023										TRUE	0.800696	TRUE	3	24	79.4901				N	N	N
A2	SR1	18S	UNKNOWN	SYBR	None	31.2777	31.2096	0.371023										TRUE	0.800696	TRUE	3	24	79.4901				N	N	N
A3	SR1	18S	UNKNOWN	SYBR	None	30.8093	31.2096	0.371023										TRUE	0.800696	TRUE	3	23	79.6613				N	N	N
B1	SR2	18S	UNKNOWN	SYBR	None	28.9218	28.9077	0.0788022										TRUE	0.800696	TRUE	3	22	79.4901				N	N	N
B2	SR2	18S	UNKNOWN	SYBR	None	28.9784	28.9077	0.0788022										TRUE	0.800696	TRUE	3	22	79.8325				N	N	N
B3	SR2	18S	UNKNOWN	SYBR	None	28.8228	28.9077	0.0788022										TRUE	0.800696	TRUE	3	21	80.0037				N	N	N
C1	SR3	18S	UNKNOWN	SYBR	None	28.5739	28.6699	0.123365										TRUE	0.800696	TRUE	3	21	79.8325				N	N	N
C2	SR3	18S	UNKNOWN	SYBR	None	28.809	28.6699	0.123365										TRUE	0.800696	TRUE	3	21	80.0037				N	N	N
C3	SR3	18S	UNKNOWN	SYBR	None	28.6267	28.6699	0.123365										TRUE	0.800696	TRUE	3	21	80.1749				N	N	N
D1	SG1	18S	UNKNOWN	SYBR	None	29.3207	29.1562	0.145784										TRUE	0.800696	TRUE	3	22	79.8325				N	N	N
D2	SG1	18S	UNKNOWN	SYBR	None	29.1049	29.1562	0.145784										TRUE	0.800696	TRUE	3	22	80.1749				N	N	N
D3	SG1	18S	UNKNOWN	SYBR	None	29.043	29.1562	0.145784										TRUE	0.800696	TRUE	3	22	80.3461				N	N	N
E1	SG2	18S	UNKNOWN	SYBR	None	30.609	30.6749	0.115255										TRUE	0.800696	TRUE	3	24	79.8325				N	N	N
E2	SG2	18S	UNKNOWN	SYBR	None	30.6078	30.6749	0.115255										TRUE	0.800696	TRUE	3	24	80.0037				N	N	N
E3	SG2	18S	UNKNOWN	SYBR	None	30.808	30.6749	0.115255										TRUE	0.800696	TRUE	3	23	80.1749				N	N	N
F1	SG3	18S	UNKNOWN	SYBR	None	29.0559	29.0898	0.0293449										TRUE	0.800696	TRUE	3	22	79.6613				N	N	N
F2	SG3	18S	UNKNOWN	SYBR	None	29.1073	29.0898	0.0293449										TRUE	0.800696	TRUE	3	22	80.0037				N	N	N
F3	SG3	18S	UNKNOWN	SYBR	None	29.1061	29.0898	0.0293449										TRUE	0.800696	TRUE	3	22	80.1749				N	N	N
A4	SR1	ANR（gene24378)	UNKNOWN	SYBR	None	26.2817	26.2052	0.0672356										TRUE	0.702687	TRUE	3	19	83.7702				N	N	N
A5	SR1	ANR（gene24378)	UNKNOWN	SYBR	None	26.1787	26.2052	0.0672356										TRUE	0.702687	TRUE	3	19	83.9414				N	N	N
A6	SR1	ANR（gene24378)	UNKNOWN	SYBR	None	26.1553	26.2052	0.0672356										TRUE	0.702687	TRUE	3	19	84.1126				N	N	N
B4	SR2	ANR（gene24378)	UNKNOWN	SYBR	None	24.7291	24.6302	0.0879391										TRUE	0.702687	TRUE	3	18	84.1126				N	N	N
B5	SR2	ANR（gene24378)	UNKNOWN	SYBR	None	24.5608	24.6302	0.0879391										TRUE	0.702687	TRUE	3	17	84.2838				N	N	N
B6	SR2	ANR（gene24378)	UNKNOWN	SYBR	None	24.6008	24.6302	0.0879391										TRUE	0.702687	TRUE	3	17	84.455				N	N	N
C4	SR3	ANR（gene24378)	UNKNOWN	SYBR	None	21.9881	21.9803	0.0305471										TRUE	0.702687	TRUE	3	15	84.455				N	N	N
C5	SR3	ANR（gene24378)	UNKNOWN	SYBR	None	22.0062	21.9803	0.0305471										TRUE	0.702687	TRUE	3	15	84.6262				N	N	N
C6	SR3	ANR（gene24378)	UNKNOWN	SYBR	None	21.9466	21.9803	0.0305471										TRUE	0.702687	TRUE	3	14	84.6262				N	N	N
D4	SG1	ANR（gene24378)	UNKNOWN	SYBR	None	22.2744	22.3426	0.0631529										TRUE	0.702687	TRUE	3	15	84.6262				N	N	N
D5	SG1	ANR（gene24378)	UNKNOWN	SYBR	None	22.3544	22.3426	0.0631529										TRUE	0.702687	TRUE	3	15	84.7974				N	N	N
D6	SG1	ANR（gene24378)	UNKNOWN	SYBR	None	22.3991	22.3426	0.0631529										TRUE	0.702687	TRUE	3	15	84.7974				N	N	N
E4	SG2	ANR（gene24378)	UNKNOWN	SYBR	None	24.8177	24.8707	0.0479676										TRUE	0.702687	TRUE	3	18	84.455				N	N	N
E5	SG2	ANR（gene24378)	UNKNOWN	SYBR	None	24.8833	24.8707	0.0479676										TRUE	0.702687	TRUE	3	18	84.6262				N	N	N
E6	SG2	ANR（gene24378)	UNKNOWN	SYBR	None	24.9111	24.8707	0.0479676										TRUE	0.702687	TRUE	3	18	84.7974				N	N	N
F4	SG3	ANR（gene24378)	UNKNOWN	SYBR	None	23.8298	23.8062	0.0828404										TRUE	0.702687	TRUE	3	17	84.455				N	N	N
F5	SG3	ANR（gene24378)	UNKNOWN	SYBR	None	23.7141	23.8062	0.0828404										TRUE	0.702687	TRUE	3	17	84.6262				N	N	N
F6	SG3	ANR（gene24378)	UNKNOWN	SYBR	None	23.8747	23.8062	0.0828404										TRUE	0.702687	TRUE	3	17	84.7974				N	N	N
A7	SR1	LAR(gene640)	UNKNOWN	SYBR	None	32.4068	32.7371	0.643247										TRUE	0.724852	TRUE	3	25	76.5796	84.7974			Y	N	Y
A8	SR1	LAR(gene640)	UNKNOWN	SYBR	None	33.4784	32.7371	0.643247										TRUE	0.724852	TRUE	3	26	84.7974	76.4084			Y	N	Y
A9	SR1	LAR(gene640)	UNKNOWN	SYBR	None	32.326	32.7371	0.643247										TRUE	0.724852	TRUE	3	25	76.2372				Y	N	N
B7	SR2	LAR(gene640)	UNKNOWN	SYBR	None	29.9096	29.9848	0.160914										TRUE	0.724852	TRUE	3	23	85.1398				N	N	N
B8	SR2	LAR(gene640)	UNKNOWN	SYBR	None	29.8753	29.9848	0.160914										TRUE	0.724852	TRUE	3	23	85.1398				N	N	N
B9	SR2	LAR(gene640)	UNKNOWN	SYBR	None	30.1696	29.9848	0.160914										TRUE	0.724852	TRUE	3	23	84.9686				N	N	N
C7	SR3	LAR(gene640)	UNKNOWN	SYBR	None	28.3647	28.3623	0.0152509										TRUE	0.724852	TRUE	3	21	85.4822				N	N	N
C8	SR3	LAR(gene640)	UNKNOWN	SYBR	None	28.3761	28.3623	0.0152509										TRUE	0.724852	TRUE	3	21	85.4822				N	N	N
C9	SR3	LAR(gene640)	UNKNOWN	SYBR	None	28.3459	28.3623	0.0152509										TRUE	0.724852	TRUE	3	21	85.311				N	N	N
D7	SG1	LAR(gene640)	UNKNOWN	SYBR	None	28.0958	27.9232	0.207538										TRUE	0.724852	TRUE	3	21	85.4822				N	N	N
D8	SG1	LAR(gene640)	UNKNOWN	SYBR	None	27.6929	27.9232	0.207538										TRUE	0.724852	TRUE	3	21	85.4822				N	N	N
D9	SG1	LAR(gene640)	UNKNOWN	SYBR	None	27.9808	27.9232	0.207538										TRUE	0.724852	TRUE	3	21	85.311				N	N	N
E7	SG2	LAR(gene640)	UNKNOWN	SYBR	None	30.9141	30.3337	0.503732										TRUE	0.724852	TRUE	3	24	85.311	76.922			Y	N	Y
E8	SG2	LAR(gene640)	UNKNOWN	SYBR	None	30.0095	30.3337	0.503732										TRUE	0.724852	TRUE	3	23	85.4822				Y	N	N
E9	SG2	LAR(gene640)	UNKNOWN	SYBR	None	30.0776	30.3337	0.503732										TRUE	0.724852	TRUE	3	23	76.7508	85.1398			Y	N	Y
F7	SG3	LAR(gene640)	UNKNOWN	SYBR	None	29.7563	29.698	0.152085										TRUE	0.724852	TRUE	3	23	85.311	77.0932			N	N	Y
F8	SG3	LAR(gene640)	UNKNOWN	SYBR	None	29.5254	29.698	0.152085										TRUE	0.724852	TRUE	3	22	85.311				N	N	N
F9	SG3	LAR(gene640)	UNKNOWN	SYBR	None	29.8123	29.698	0.152085										TRUE	0.724852	TRUE	3	23	84.9686	76.5796			N	N	Y
A10	SR1	LAR(gene38150)	UNKNOWN	SYBR	None	31.2196	30.904	0.273628										TRUE	0.952185	TRUE	3	24	82.7429				N	N	N
A11	SR1	LAR(gene38150)	UNKNOWN	SYBR	None	30.7605	30.904	0.273628										TRUE	0.952185	TRUE	3	23	82.9141				N	N	N
A12	SR1	LAR(gene38150)	UNKNOWN	SYBR	None	30.732	30.904	0.273628										TRUE	0.952185	TRUE	3	23	82.7429				N	N	N
B10	SR2	LAR(gene38150)	UNKNOWN	SYBR	None	26.6817	26.6337	0.20719										TRUE	0.952185	TRUE	3	19	83.4277				N	N	N
B11	SR2	LAR(gene38150)	UNKNOWN	SYBR	None	26.8127	26.6337	0.20719										TRUE	0.952185	TRUE	3	19	83.2565				N	N	N
B12	SR2	LAR(gene38150)	UNKNOWN	SYBR	None	26.4068	26.6337	0.20719										TRUE	0.952185	TRUE	3	19	83.0853				N	N	N
C10	SR3	LAR(gene38150)	UNKNOWN	SYBR	None	24.2007	24.1724	0.034737										TRUE	0.952185	TRUE	3	17	83.7702				N	N	N
C11	SR3	LAR(gene38150)	UNKNOWN	SYBR	None	24.1336	24.1724	0.034737										TRUE	0.952185	TRUE	3	16	83.2565				N	N	N
C12	SR3	LAR(gene38150)	UNKNOWN	SYBR	None	24.183	24.1724	0.034737										TRUE	0.952185	TRUE	3	16	83.2565				N	N	N
D10	SG1	LAR(gene38150)	UNKNOWN	SYBR	None	25.8215	26.4723	1.04263										TRUE	0.952185	TRUE	3	18	83.7702				Y	N	N
D11	SG1	LAR(gene38150)	UNKNOWN	SYBR	None	27.6749	26.4723	1.04263										TRUE	0.952185	TRUE	3	20	83.0853				Y	N	N
D12	SG1	LAR(gene38150)	UNKNOWN	SYBR	None	25.9205	26.4723	1.04263										TRUE	0.952185	TRUE	3	18	83.2565				Y	N	N
E10	SG2	LAR(gene38150)	UNKNOWN	SYBR	None	27.9554	28.2283	0.239743										TRUE	0.952185	TRUE	3	21	83.9414				N	N	N
E11	SG2	LAR(gene38150)	UNKNOWN	SYBR	None	28.324	28.2283	0.239743										TRUE	0.952185	TRUE	3	21	83.599				N	N	N
E12	SG2	LAR(gene38150)	UNKNOWN	SYBR	None	28.4053	28.2283	0.239743										TRUE	0.952185	TRUE	3	21	83.2565				N	N	N
F10	SG3	LAR(gene38150)	UNKNOWN	SYBR	None	25.7647	25.8298	0.0651074										TRUE	0.952185	TRUE	3	18	83.7702				N	N	N
F11	SG3	LAR(gene38150)	UNKNOWN	SYBR	None	25.8298	25.8298	0.0651074										TRUE	0.952185	TRUE	3	18	83.599				N	N	N
F12	SG3	LAR(gene38150)	UNKNOWN	SYBR	None	25.895	25.8298	0.0651074										TRUE	0.952185	TRUE	3	19	83.2565				N	N	N
G1	SR1	ANR(gene21099)	UNKNOWN	SYBR	None	31.395	31.2648	0.960787										TRUE	0.612073	TRUE	3	24	75.7236				Y	N	N
G2	SR1	ANR(gene21099)	UNKNOWN	SYBR	None	32.1539	31.2648	0.960787										TRUE	0.612073	TRUE	3	25	75.8948				Y	N	N
G3	SR1	ANR(gene21099)	UNKNOWN	SYBR	None	30.2456	31.2648	0.960787										TRUE	0.612073	TRUE	3	23	76.2372				Y	N	N
G4	SR2	ANR(gene21099)	UNKNOWN	SYBR	None	30.4472	31.2203	1.18615										TRUE	0.612073	TRUE	3	24	76.2372				Y	N	N
G5	SR2	ANR(gene21099)	UNKNOWN	SYBR	None	32.5859	31.2203	1.18615										TRUE	0.612073	TRUE	3	27	76.4084				Y	N	N
G6	SR2	ANR(gene21099)	UNKNOWN	SYBR	None	30.6276	31.2203	1.18615										TRUE	0.612073	TRUE	3	24	76.7508				Y	N	N
G7	SR3	ANR(gene21099)	UNKNOWN	SYBR	None	32.974	31.5889	2.39465										TRUE	0.612073	TRUE	3	27	76.7508				Y	N	N
G8	SR3	ANR(gene21099)	UNKNOWN	SYBR	None	28.8238	31.5889	2.39465										TRUE	0.612073	TRUE	3	22	76.922				Y	Y	N
G9	SR3	ANR(gene21099)	UNKNOWN	SYBR	None	32.9689	31.5889	2.39465										TRUE	0.612073	TRUE	3	26	76.2372				Y	N	N
H1	SG1	ANR(gene21099)	UNKNOWN	SYBR	None	32.0878	31.5489	0.604562										TRUE	0.612073	TRUE	3	26	75.3811	81.2021			Y	N	Y
H2	SG1	ANR(gene21099)	UNKNOWN	SYBR	None	30.8952	31.5489	0.604562										TRUE	0.612073	TRUE	3	25	75.7236				Y	N	N
H3	SG1	ANR(gene21099)	UNKNOWN	SYBR	None	31.6638	31.5489	0.604562										TRUE	0.612073	TRUE	3	25	75.8948	81.5445			Y	N	Y
H4	SG2	ANR(gene21099)	UNKNOWN	SYBR	None	31.0916	31.079	0.145897										TRUE	0.612073	TRUE	3	25	76.2372				N	N	N
H5	SG2	ANR(gene21099)	UNKNOWN	SYBR	None	31.2181	31.079	0.145897										TRUE	0.612073	TRUE	3	25	76.2372				N	N	N
H6	SG2	ANR(gene21099)	UNKNOWN	SYBR	None	30.9272	31.079	0.145897										TRUE	0.612073	TRUE	3	24	76.4084				N	N	N
H7	SG3	ANR(gene21099)	UNKNOWN	SYBR	None	33.5589	34.3901	0.761503										TRUE	0.612073	TRUE	3	27	76.2372				Y	N	N
H8	SG3	ANR(gene21099)	UNKNOWN	SYBR	None	35.0542	34.3901	0.761503										TRUE	0.612073	TRUE	3	29	75.8948				Y	N	N
H9	SG3	ANR(gene21099)	UNKNOWN	SYBR	None	34.5573	34.3901	0.761503										TRUE	0.612073	TRUE	3	27	77.2644				Y	N	N
Analysis Type	Singleplex
Endogenous Control	18S
RQ Min/Max Confidence Level	95.0
Reference Sample	R1

## Sheet: Sheet1
Block Type	96fast
Chemistry	SYBR_GREEN
Experiment Run End Time	2020-12-23 19:54:16 PM PST
Instrument Type	sds7500fast
Passive Reference	ROX
Well	Sample Name	Target Name	Task	Reporter	Quencher	Cт	Cт Mean	Cт SD	Quantity	Normalized Quantity	Normalized Quantity Mean	Normalized Quantity SEM	RQ	RQ Min	RQ Max	Efficiency	Slope	Automatic Ct Threshold	Ct Threshold	Automatic Baseline	Baseline Start	Baseline End	Tm1	Tm2	Tm3	Comments	HIGHSD	MTP
A1	SG1	18s	UNKNOWN	SYBR	None	27.8357	27.8777	0.0480106										TRUE	0.632665	TRUE	3	21	79.7				N	N
A2	SG1	18s	UNKNOWN	SYBR	None	27.93	27.8777	0.0480106										TRUE	0.632665	TRUE	3	21	79.7				N	N
A3	SG1	18s	UNKNOWN	SYBR	None	27.8673	27.8777	0.0480106										TRUE	0.632665	TRUE	3	21	79.8621				N	N
A4	SG1	MYB1b（gene38312）	UNKNOWN	SYBR	None	31.0364	31.5261	0.608041										TRUE	0.511929	TRUE	3	24	81.8069				Y	N
A5	SG1	MYB1b（gene38312）	UNKNOWN	SYBR	None	32.2066	31.5261	0.608041										TRUE	0.511929	TRUE	3	26	81.969				Y	N
A6	SG1	MYB1b（gene38312）	UNKNOWN	SYBR	None	31.3351	31.5261	0.608041										TRUE	0.511929	TRUE	3	25	82.131				Y	N
A7	SG1	MYB6a（gene32351）	UNKNOWN	SYBR	None	29.9036	30.1125	0.205996										TRUE	0.560808	TRUE	3	23	81.6448				N	N
A8	SG1	MYB6a（gene32351）	UNKNOWN	SYBR	None	30.3155	30.1125	0.205996										TRUE	0.560808	TRUE	3	24	81.3207				N	N
A9	SG1	MYB6a（gene32351）	UNKNOWN	SYBR	None	30.1185	30.1125	0.205996										TRUE	0.560808	TRUE	3	24	81.3207				N	N
A10	SG1	MYB123（gene9445）	UNKNOWN	SYBR	None	25.7609	25.7455	0.0583248										TRUE	0.630479	TRUE	3	19	79.5379				N	N
A11	SG1	MYB123（gene9445）	UNKNOWN	SYBR	None	25.7946	25.7455	0.0583248										TRUE	0.630479	TRUE	3	19	79.3759				N	N
A12	SG1	MYB123（gene9445）	UNKNOWN	SYBR	None	25.681	25.7455	0.0583248										TRUE	0.630479	TRUE	3	19	79.3759				N	N
B1	SG1	TT2（gene39085）	UNKNOWN	SYBR	None	27.5987	27.5715	0.0240484										TRUE	0.333001	TRUE	3	22	78.8897				N	N
B2	SG1	TT2（gene39085）	UNKNOWN	SYBR	None	27.5625	27.5715	0.0240484										TRUE	0.333001	TRUE	3	22	79.0517				N	N
B3	SG1	TT2（gene39085）	UNKNOWN	SYBR	None	27.5532	27.5715	0.0240484										TRUE	0.333001	TRUE	3	22	79.2138				N	N
B4	SG2	18s	UNKNOWN	SYBR	None	27.4993	27.4633	0.0314141										TRUE	0.632665	TRUE	3	21	80.8345				N	N
B5	SG2	18s	UNKNOWN	SYBR	None	27.4413	27.4633	0.0314141										TRUE	0.632665	TRUE	3	20	80.8345				N	N
B6	SG2	18s	UNKNOWN	SYBR	None	27.4493	27.4633	0.0314141										TRUE	0.632665	TRUE	3	21	81.1586				N	N
B7	SG2	MYB1b（gene38312）	UNKNOWN	SYBR	None	27.4871	27.6528	0.144363										TRUE	0.511929	TRUE	3	21	82.6172				N	N
B8	SG2	MYB1b（gene38312）	UNKNOWN	SYBR	None	27.7518	27.6528	0.144363										TRUE	0.511929	TRUE	3	22	82.6172				N	N
B9	SG2	MYB1b（gene38312）	UNKNOWN	SYBR	None	27.7194	27.6528	0.144363										TRUE	0.511929	TRUE	3	22	82.6172				N	N
B10	SG2	MYB6a（gene32351）	UNKNOWN	SYBR	None	28.732	28.8871	0.2034										TRUE	0.560808	TRUE	3	22	81.969				N	N
B11	SG2	MYB6a（gene32351）	UNKNOWN	SYBR	None	28.812	28.8871	0.2034										TRUE	0.560808	TRUE	3	22	81.8069				N	N
B12	SG2	MYB6a（gene32351）	UNKNOWN	SYBR	None	29.1174	28.8871	0.2034										TRUE	0.560808	TRUE	3	23	82.2931				N	N
C1	SG2	MYB123（gene9445）	UNKNOWN	SYBR	None	23.7765	23.8033	0.0297462										TRUE	0.630479	TRUE	3	17	80.0241				N	N
C2	SG2	MYB123（gene9445）	UNKNOWN	SYBR	None	23.798	23.8033	0.0297462										TRUE	0.630479	TRUE	3	17	80.3483				N	N
C3	SG2	MYB123（gene9445）	UNKNOWN	SYBR	None	23.8353	23.8033	0.0297462										TRUE	0.630479	TRUE	3	16	80.5103				N	N
C4	SG2	TT2（gene39085）	UNKNOWN	SYBR	None	26.7039	26.7196	0.0294848										TRUE	0.333001	TRUE	3	21	80.3483				N	N
C5	SG2	TT2（gene39085）	UNKNOWN	SYBR	None	26.7536	26.7196	0.0294848										TRUE	0.333001	TRUE	3	20	80.6724				N	N
C6	SG2	TT2（gene39085）	UNKNOWN	SYBR	None	26.7013	26.7196	0.0294848										TRUE	0.333001	TRUE	3	21	80.5103				N	N
C7	SG3	18s	UNKNOWN	SYBR	None	27.7367	27.9305	0.371659										TRUE	0.632665	TRUE	3	21	80.5103				N	N
C8	SG3	18s	UNKNOWN	SYBR	None	27.6959	27.9305	0.371659										TRUE	0.632665	TRUE	3	21	80.5103				N	N
C9	SG3	18s	UNKNOWN	SYBR	None	28.359	27.9305	0.371659										TRUE	0.632665	TRUE	3	22	80.3483				N	N
C10	SG3	MYB1b（gene38312）	UNKNOWN	SYBR	None	28.5373	28.7777	0.210799										TRUE	0.511929	TRUE	3	22	81.969				N	N
C11	SG3	MYB1b（gene38312）	UNKNOWN	SYBR	None	28.9309	28.7777	0.210799										TRUE	0.511929	TRUE	3	23	81.8069				N	N
C12	SG3	MYB1b（gene38312）	UNKNOWN	SYBR	None	28.8648	28.7777	0.210799										TRUE	0.511929	TRUE	3	22	81.6448				N	N
D1	SG3	MYB6a（gene32351）	UNKNOWN	SYBR	None	29.7887	29.8361	0.0410494										TRUE	0.560808	TRUE	3	23	81.1586				N	N
D2	SG3	MYB6a（gene32351）	UNKNOWN	SYBR	None	29.8607	29.8361	0.0410494										TRUE	0.560808	TRUE	3	23	81.3207				N	N
D3	SG3	MYB6a（gene32351）	UNKNOWN	SYBR	None	29.8589	29.8361	0.0410494										TRUE	0.560808	TRUE	3	23	81.4828				N	N
D4	SG3	MYB123（gene9445）	UNKNOWN	SYBR	None	24.4743	24.603	0.124142										TRUE	0.630479	TRUE	3	18	80.0241				N	N
D5	SG3	MYB123（gene9445）	UNKNOWN	SYBR	None	24.6129	24.603	0.124142										TRUE	0.630479	TRUE	3	18	80.1862				N	N
D6	SG3	MYB123（gene9445）	UNKNOWN	SYBR	None	24.722	24.603	0.124142										TRUE	0.630479	TRUE	3	18	80.3483				N	N
D7	SG3	TT2（gene39085）	UNKNOWN	SYBR	None	27.0529	26.9835	0.133558										TRUE	0.333001	TRUE	3	21	79.7				N	N
D8	SG3	TT2（gene39085）	UNKNOWN	SYBR	None	26.8295	26.9835	0.133558										TRUE	0.333001	TRUE	3	21	79.7				N	N
D9	SG3	TT2（gene39085）	UNKNOWN	SYBR	None	27.0681	26.9835	0.133558										TRUE	0.333001	TRUE	3	21	79.5379				N	N
D10	SR1	18s	UNKNOWN	SYBR	None	27.4368	27.4563	0.0168777										TRUE	0.632665	TRUE	3	21	80.3483				N	N
D11	SR1	18s	UNKNOWN	SYBR	None	27.4653	27.4563	0.0168777										TRUE	0.632665	TRUE	3	21	80.1862				N	N
D12	SR1	18s	UNKNOWN	SYBR	None	27.4667	27.4563	0.0168777										TRUE	0.632665	TRUE	3	20	79.8621				N	N
E1	SR1	MYB1b（gene38312）	UNKNOWN	SYBR	None	29.1408	29.1352	0.119233										TRUE	0.511929	TRUE	3	23	81.6448				N	N
E2	SR1	MYB1b（gene38312）	UNKNOWN	SYBR	None	29.2515	29.1352	0.119233										TRUE	0.511929	TRUE	3	23	81.8069				N	N
E3	SR1	MYB1b（gene38312）	UNKNOWN	SYBR	None	29.0133	29.1352	0.119233										TRUE	0.511929	TRUE	3	23	82.131				N	N
E4	SR1	MYB6a（gene32351）	UNKNOWN	SYBR	None	28.9044	28.7634	0.177534										TRUE	0.560808	TRUE	3	22	81.8069				N	N
E5	SR1	MYB6a（gene32351）	UNKNOWN	SYBR	None	28.564	28.7634	0.177534										TRUE	0.560808	TRUE	3	22	81.969				N	N
E6	SR1	MYB6a（gene32351）	UNKNOWN	SYBR	None	28.8217	28.7634	0.177534										TRUE	0.560808	TRUE	3	23	81.969				N	N
E7	SR1	MYB123（gene9445）	UNKNOWN	SYBR	None	24.7883	24.7764	0.0144144										TRUE	0.630479	TRUE	3	18	80.3483				N	N
E8	SR1	MYB123（gene9445）	UNKNOWN	SYBR	None	24.7603	24.7764	0.0144144										TRUE	0.630479	TRUE	3	18	80.1862				N	N
E9	SR1	MYB123（gene9445）	UNKNOWN	SYBR	None	24.7805	24.7764	0.0144144										TRUE	0.630479	TRUE	3	18	80.1862				N	N
E10	SR1	TT2（gene39085）	UNKNOWN	SYBR	None	25.9616	25.923	0.0374959										TRUE	0.333001	TRUE	3	20	79.5379				N	N
E11	SR1	TT2（gene39085）	UNKNOWN	SYBR	None	25.9208	25.923	0.0374959										TRUE	0.333001	TRUE	3	20	79.3759				N	N
E12	SR1	TT2（gene39085）	UNKNOWN	SYBR	None	25.8867	25.923	0.0374959										TRUE	0.333001	TRUE	3	20	79.0517				N	N
F1	SR2	18s	UNKNOWN	SYBR	None	26.6308	26.546	0.11711										TRUE	0.632665	TRUE	3	20	79.5379				N	N
F2	SR2	18s	UNKNOWN	SYBR	None	26.4123	26.546	0.11711										TRUE	0.632665	TRUE	3	20	79.8621				N	N
F3	SR2	18s	UNKNOWN	SYBR	None	26.5947	26.546	0.11711										TRUE	0.632665	TRUE	3	19	80.0241				N	N
F4	SR2	MYB1b（gene38312）	UNKNOWN	SYBR	None	28.2297	28.334	0.217284										TRUE	0.511929	TRUE	3	22	82.2931				N	N
F5	SR2	MYB1b（gene38312）	UNKNOWN	SYBR	None	28.5837	28.334	0.217284										TRUE	0.511929	TRUE	3	23	82.4552				N	N
F6	SR2	MYB1b（gene38312）	UNKNOWN	SYBR	None	28.1885	28.334	0.217284										TRUE	0.511929	TRUE	3	22	82.6172				N	N
F7	SR2	MYB6a（gene32351）	UNKNOWN	SYBR	None	28.2772	28.3816	0.165515										TRUE	0.560808	TRUE	3	23	82.131				N	N
F8	SR2	MYB6a（gene32351）	UNKNOWN	SYBR	None	28.2952	28.3816	0.165515										TRUE	0.560808	TRUE	3	22	81.969				N	N
F9	SR2	MYB6a（gene32351）	UNKNOWN	SYBR	None	28.5724	28.3816	0.165515										TRUE	0.560808	TRUE	3	22	81.8069				N	N
F10	SR2	MYB123（gene9445）	UNKNOWN	SYBR	None	23.9131	23.9507	0.0325668										TRUE	0.630479	TRUE	3	18	79.8621				N	N
F11	SR2	MYB123（gene9445）	UNKNOWN	SYBR	None	23.9702	23.9507	0.0325668										TRUE	0.630479	TRUE	3	17	79.7				N	N
F12	SR2	MYB123（gene9445）	UNKNOWN	SYBR	None	23.9687	23.9507	0.0325668										TRUE	0.630479	TRUE	3	17	79.5379				N	N
G1	SR2	TT2（gene39085）	UNKNOWN	SYBR	None	25.8383	25.8241	0.0200094										TRUE	0.333001	TRUE	3	20	78.5655				N	N
G2	SR2	TT2（gene39085）	UNKNOWN	SYBR	None	25.8012	25.8241	0.0200094										TRUE	0.333001	TRUE	3	20	78.8897				N	N
G3	SR2	TT2（gene39085）	UNKNOWN	SYBR	None	25.8328	25.8241	0.0200094										TRUE	0.333001	TRUE	3	21	79.0517				N	N
G4	SR3	18s	UNKNOWN	SYBR	None	28.841	28.8512	0.111822										TRUE	0.632665	TRUE	3	22	80.1862				N	N
G5	SR3	18s	UNKNOWN	SYBR	None	28.7448	28.8512	0.111822										TRUE	0.632665	TRUE	3	22	80.3483				N	N
G6	SR3	18s	UNKNOWN	SYBR	None	28.9677	28.8512	0.111822										TRUE	0.632665	TRUE	3	22	80.6724				N	N
G7	SR3	MYB1b（gene38312）	UNKNOWN	SYBR	None	29.0964	29.136	0.0568523										TRUE	0.511929	TRUE	3	23	82.2931				N	N
G8	SR3	MYB1b（gene38312）	UNKNOWN	SYBR	None	29.1104	29.136	0.0568523										TRUE	0.511929	TRUE	3	23	82.131				N	N
G9	SR3	MYB1b（gene38312）	UNKNOWN	SYBR	None	29.2011	29.136	0.0568523										TRUE	0.511929	TRUE	3	23	82.131				N	N
G10	SR3	MYB6a（gene32351）	UNKNOWN	SYBR	None	30.1989	30.0938	0.150962										TRUE	0.560808	TRUE	3	23	81.4828				N	N
G11	SR3	MYB6a（gene32351）	UNKNOWN	SYBR	None	30.1616	30.0938	0.150962										TRUE	0.560808	TRUE	3	24	81.3207				N	N
G12	SR3	MYB6a（gene32351）	UNKNOWN	SYBR	None	29.9208	30.0938	0.150962										TRUE	0.560808	TRUE	3	23	81.1586				N	N
H1	SR3	MYB123（gene9445）	UNKNOWN	SYBR	None	25.2678	24.9795	0.254118										TRUE	0.630479	TRUE	3	18	79.2138				N	N
H2	SR3	MYB123（gene9445）	UNKNOWN	SYBR	None	24.7882	24.9795	0.254118										TRUE	0.630479	TRUE	3	18	79.8621				N	N
H3	SR3	MYB123（gene9445）	UNKNOWN	SYBR	None	24.8824	24.9795	0.254118										TRUE	0.630479	TRUE	3	18	79.8621				N	N
H4	SR3	TT2（gene39085）	UNKNOWN	SYBR	None	27.3329	27.2545	0.236169										TRUE	0.333001	TRUE	3	22	79.2138	84.2379			N	Y
H5	SR3	TT2（gene39085）	UNKNOWN	SYBR	None	27.4416	27.2545	0.236169										TRUE	0.333001	TRUE	3	22	80.3483				N	N
H6	SR3	TT2（gene39085）	UNKNOWN	SYBR	None	26.9892	27.2545	0.236169										TRUE	0.333001	TRUE	3	21	80.1862				N	N
Analysis Type	Singleplex
Endogenous Control	18s
RQ Min/Max Confidence Level	95.0
Reference Sample	G1
